# Supplementary material for: The intrinsic microglial molecular clock controls synaptic strength via the circadian expression of cathepsin S
Source: PubMed Central journal article supplement — Sci Rep. 2013 Sep 25;3:2744. doi: 10.1038/srep02744 (PMC3783043; doi:10.1038/srep02744), 2013-09-25
Supplement: srep02744-s1.pdf [file srep02744-s1.pdf]

SUPPLEMENTARY INFORMATION  
for

The intrinsic microglial molecular clock controls diurnal variations of synaptic strength and locomotor activity via the circadian expression of cathepsin S

Yoshinori Hayashi, Satoru Koyanagi, Naoki Kusunose, Ryo Okada, Zhou Wu, Hidetoshi Tozaki-Saitoh, Kiyoharu Ukai, Shinichi Kohsaka, Kazuhide Inoue, Shigehiro Ohdo & Hiroshi Nakanishi

Supplementary information includes:

Supplementary Figures S1-S4

Supplementary Tables S1

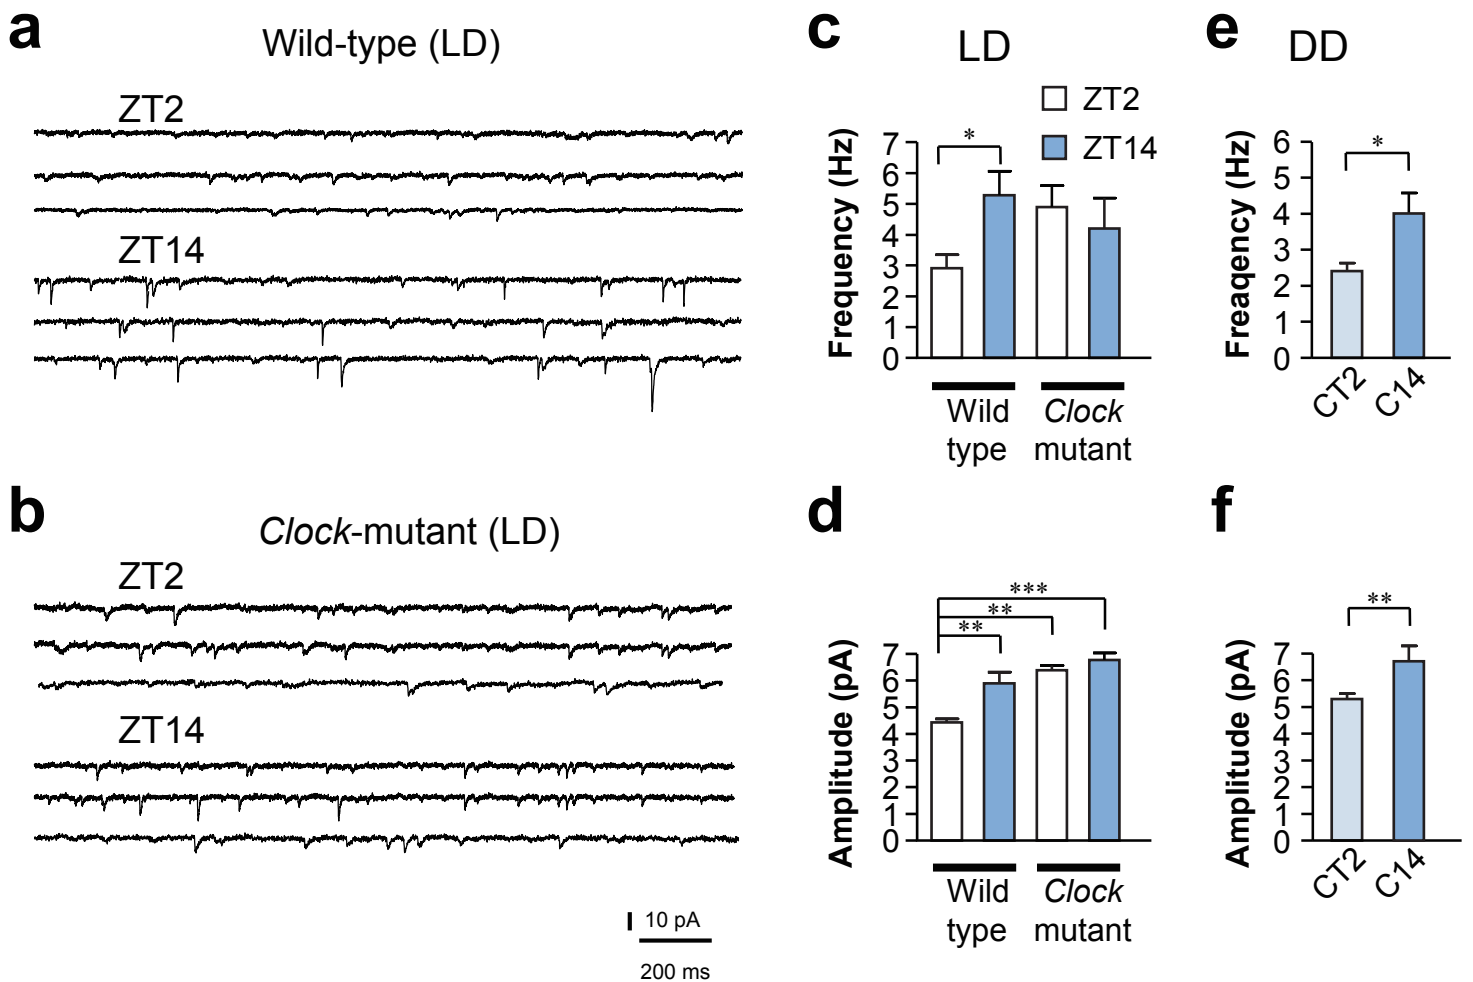

**Supplementary Figure S1.** Deficits in the circadian changes in the neuronal synaptic activities in *clock*-mutant mice. (**a and b**) Typical traces of mEPSCs recorded from cortical neurons from wild-type (**a**) and *clock*-mutant mice (**b**) at ZT2 and 14. (**c and d**) The mean frequency (**c**) and amplitude (**d**) of mEPSCs recorded from wild-type and *clock*-mutant mice under the LD cycle. (**e and f**) The mean frequency (**e**) and amplitude (**f**) of mEPSCs recorded from wild-type mice under the DD cycle. The asterisks indicate statistically significant differences between values. \*,  $P < 0.05$ ; \*\*,  $P < 0.01$ ; \*\*\*,  $P < 0.001$ ; two-way ANOVA (**c and d**). \*,  $P < 0.05$ ; \*\*,  $P < 0.01$ ; unpaired *t*-test (**e and f**). The data are the means  $\pm$  S.E.M. (animals = 3,  $n = 10$ -20 neurons, each).

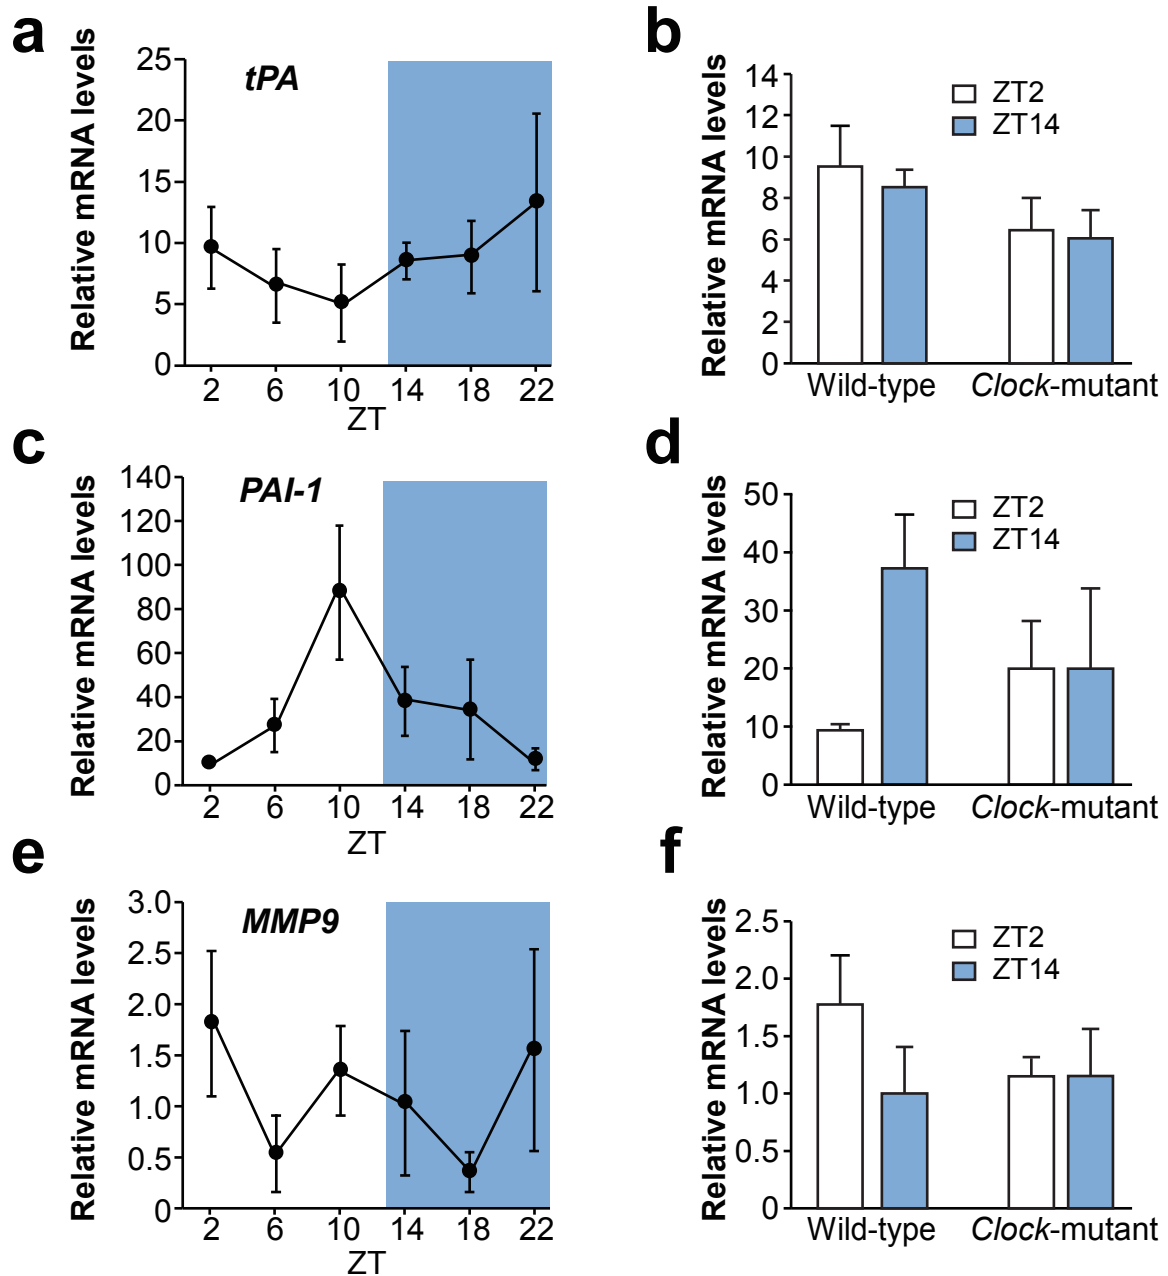

**Supplementary Figure S2. Circadian changes in the expression of *tPA*, *PAI-1* and *MMP-9* in cortical microglia.** (a, c, and e) Neither *tPA* (a) nor *MMP-9* (e) showed circadian oscillation. On the other hand, *PAI-1*, an endogenous inhibitor of *tPA*, exhibited circadian oscillation (c), but this oscillation was not correlated with *Per1* or *Per2* oscillation. The data are the means  $\pm$  S.E.M. (n=3, each,  $P=0.245$  (a), 0.0015 (c), 0.087 (e), respectively. one-way ANOVA). (b, d, and f) The relative mean mRNA levels were normalized to the  $\beta$ -actin level. The data are the means  $\pm$  S.E.M. (n=3 independent experiments, each).

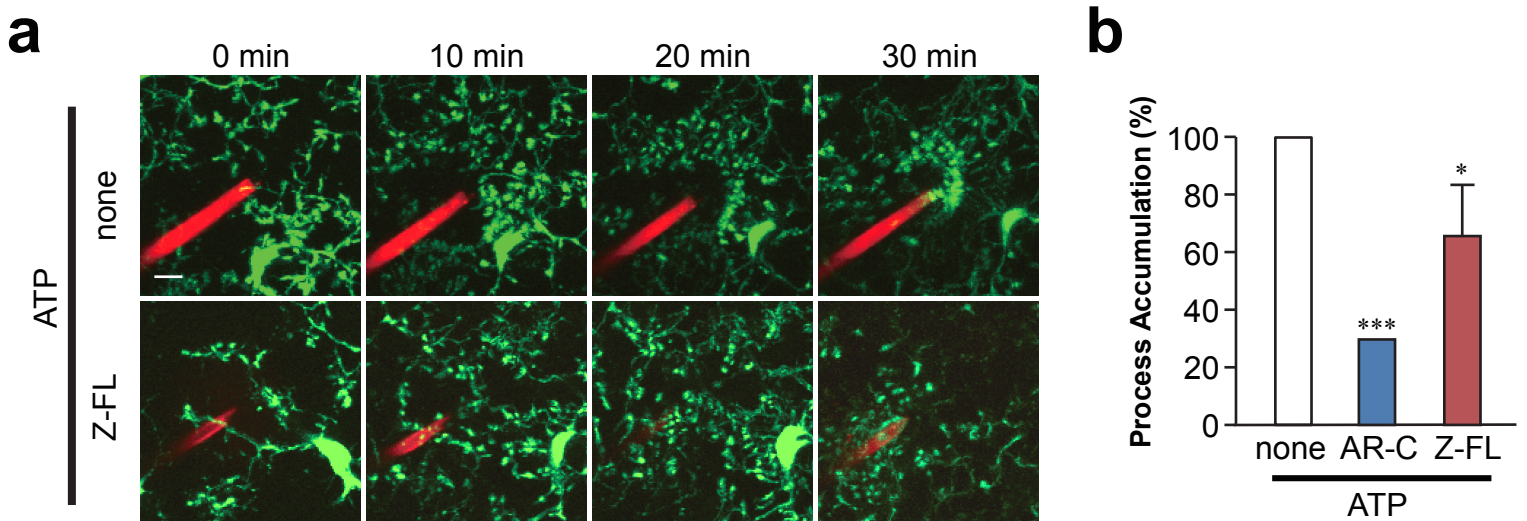

**Supplementary Figure S3. Examination of the possible involvement of CatS in the ATP-induced movement of microglial processes in Iba1-EGFP mice using the two-photon imaging system.** (a) GFP-expressing microglia in the somatosensory cortex were visualized in vivo using two-photon time-lapse microscopy. ATP (1 mM)-induced robust process extension toward the tip of the electrode (containing rhodamin-dextran, red), which was significantly inhibited by Z-FL-COCHO (Z-FL; a CatS inhibitor, 1  $\mu$ M). Scale Bar: 10  $\mu$ m. (b) The mean relative process accumulation of microglial processes at 30 min after the focal application of ATP (1 mM) in the presence and absence of AR-C 66096 (AR-C; a P2Y<sub>12</sub>R inhibitor, 10  $\mu$ M) or Z-FL-COCHO (Z-FL; a CatS inhibitor, 1  $\mu$ M). The asterisks indicate statistically significant differences from none-treated control (\*,  $P < 0.05$ ; \*\*\*,  $P < 0.001$ ; one-way ANOVA).

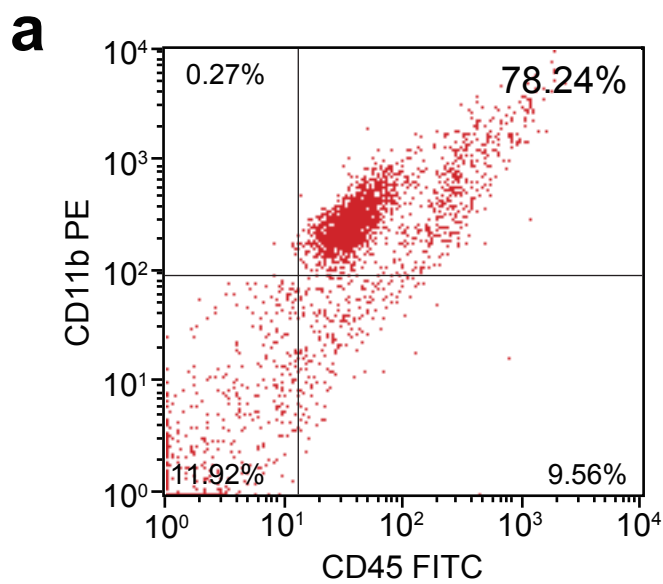

| Quad | Events | % Gated |
|------|--------|---------|
| UL   | 25     | 0.27    |
| UR   | 885    | 9.56    |
| LL   | 7240   | 78.24   |
| LR   | 1103   | 11.92   |

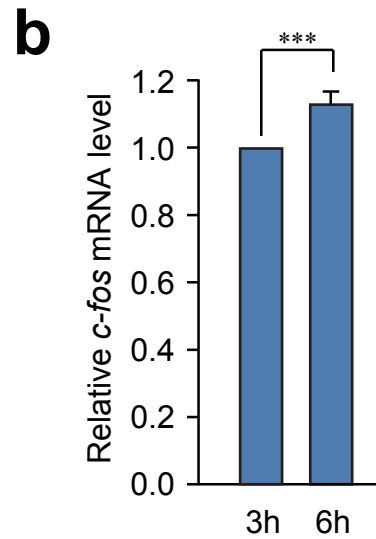

**Supplementary Figure S4. Isolation of cortical microglia from adult mice.** (a) The purity of microglia preparation (78.24%) was assessed by a FACS analysis using PE-labeled anti-CD11b and FITC-labeled CD45. (b) Microglia were activated by the passage of preparation time during preparation. The preparations were completed by 3h and 6h. The expression levels of *c-fos* mRNA were measured as an index of microglial activation. The asterisks indicate statistically significant differences between values (n=3 independent experiments. \*\*\*,  $P < 0.001$ ; unpaired *t*-test).

**Supplementary Table 1.**

| Gene                              | Direction          | Primer sequence                                                  | Amplicons |
|-----------------------------------|--------------------|------------------------------------------------------------------|-----------|
| <i>Per1</i>                       | Forward<br>Reverse | 5'-CCAGATTGGTGGAGGTTACTGAGT-3'<br>5'-GCGAGAGTCTTCTTGGAGCAGTAG-3' | 92 bp     |
| <i>Per2</i>                       | Forward<br>Reverse | 5'-TTCCACTATGTGACAGCGGAGG-3'<br>5'-CGTATCCATTCATGTCGGGCTC-3'     | 187 bp    |
| <i>Rev-erb<math>\alpha</math></i> | Forward<br>Reverse | 5'-CCCTGGACTCCAATAACAACACA-3'<br>5'-GCCATTGGAGCTGTCACTGTAG-3'    | 110 bp    |
| <i>Bmal1</i>                      | Forward<br>Reverse | 5'-CTATCTTCCTCGGACACTGC-3<br>5'-CTTCTTGCCCTCTGGAGAAG-3'          | 216 bp    |
| <i>CatS</i>                       | Forward<br>Reverse | 5'-ATGGCTGTTTTGGATGCCCC-3'<br>5'-TTCCCAGATGAGACGCCGTA-3'         | 154 bp    |
| <i>tPA</i>                        | Forward<br>Reverse | 5'-CAGCTCCCTGACTGGACAGA-3'<br>5'-GCATGCATCGTGGAGGTCTT-3'         | 216 bp    |
| <i>PAI-1</i>                      | Forward<br>Reverse | 5'-GGACACCCTCAGCATGTTCA-3'<br>5'-TCTGATGAGTTCAGCATCCAAGA-3'      | 92 bp     |
| <i>MMP-9</i>                      | Forward<br>Reverse | 5'-CAAGTGGGACCATCATAACA-3'<br>5'-GCTTCGGGTCCGTACA-3'             | 150 bp    |
| <i>c-fos</i>                      | Forward<br>Reverse | 5'- AGAGCGGGAATGGTGAAG -3'<br>5'- GGATTCTCCGTTTCTCTTCC -3'       | 106 bp    |
| <i><math>\beta</math>-Actin</i>   | Forward<br>Reverse | 5'-CACACCTTCTACAATGAGCTGC-3'<br>5'-CATGATCTGGGTCATCTTTTCA-3'     | 109 bp    |
